# Supplementary material for: Porous zinc and cobalt 2-nitroimidazolate frameworks with six-membered ring windows and a layered cobalt 2-nitroimidazolate polymorph
Source: Royal Society of Chemistry journal article supplement (doi:10.1039/c6ce02476a), 2017-01-01
Supplement: c6ce02476a1.pdf [file c6ce02476a1.pdf]

## Supplementary Information

### **Porous zinc and cobalt 2-nitroimidazolate frameworks with six-membered ring windows and a layered cobalt 2-nitroimidazolate polymorph**

Angelica Orsi,<sup>a</sup> David J. Price,<sup>a</sup> Jürgen Kahr,<sup>a</sup> Renjith S. Pillai,<sup>b</sup> Scott Sneddon,<sup>a</sup> Shuai Cao,<sup>c</sup> Virginie Benoit,<sup>d</sup> Magdalena M. Łozińska,<sup>a</sup> David B. Cordes,<sup>a</sup> Alexandra M. Z. Slawin,<sup>a</sup> Philip L. Llewellyn,<sup>d</sup> Ian Casely,<sup>c</sup> Sharon E. Ashbrook,<sup>a</sup> Guillaume Maurin,<sup>b</sup> and Paul A. Wright,<sup>a,\*</sup>

<sup>a</sup> EaStCHEM School of Chemistry, University of St Andrews, Purdie Building, North Haugh, St Andrews, Fife, KY16 9ST, United Kingdom.

<sup>b</sup> Institut Charles Gerhardt Montpellier, UMR-5253, Université de Montpellier, CNRS, ENSCM, Place E. Bataillon, 34095 Montpellier cedex 05, France.

<sup>c</sup> Johnson Matthey Technology Centre, Sonning Common, Reading, RG4 9NH, UK.

<sup>d</sup> Aix-Marseille University, CNRS, MADIREL (UMR 7246), Centre de St Jérôme, 13397 Marseille cedex 20, France.

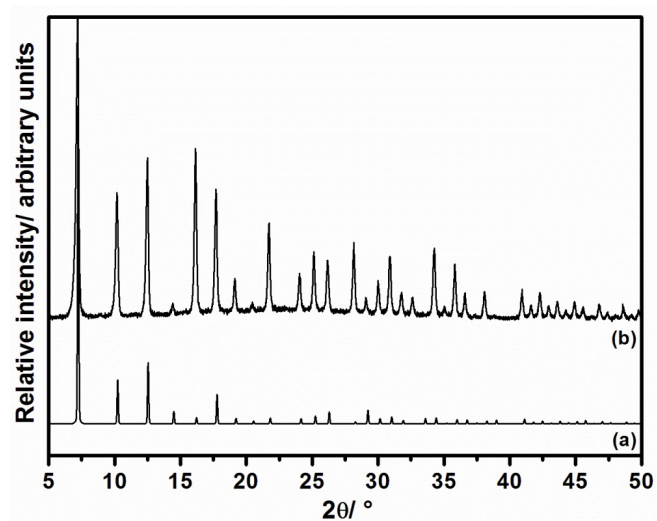

**Figure S1.** PXRD patterns of (a) the simulated PXRD from single crystal XRD data of ZIF-65(Zn) and (b) as-prepared ZIF-65(Zn).

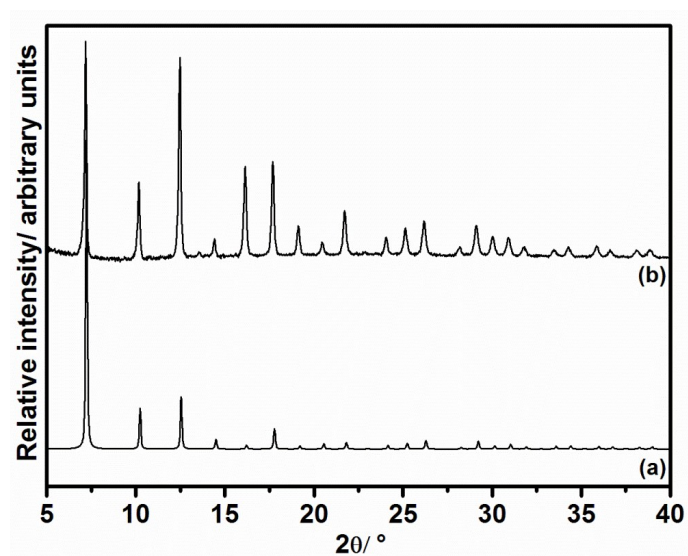

**Figure S2.** PXRD patterns of (a) the simulated PXRD from single crystal XRD data of ZIF-65(Co) and (b) as-prepared ZIF-65(Co).

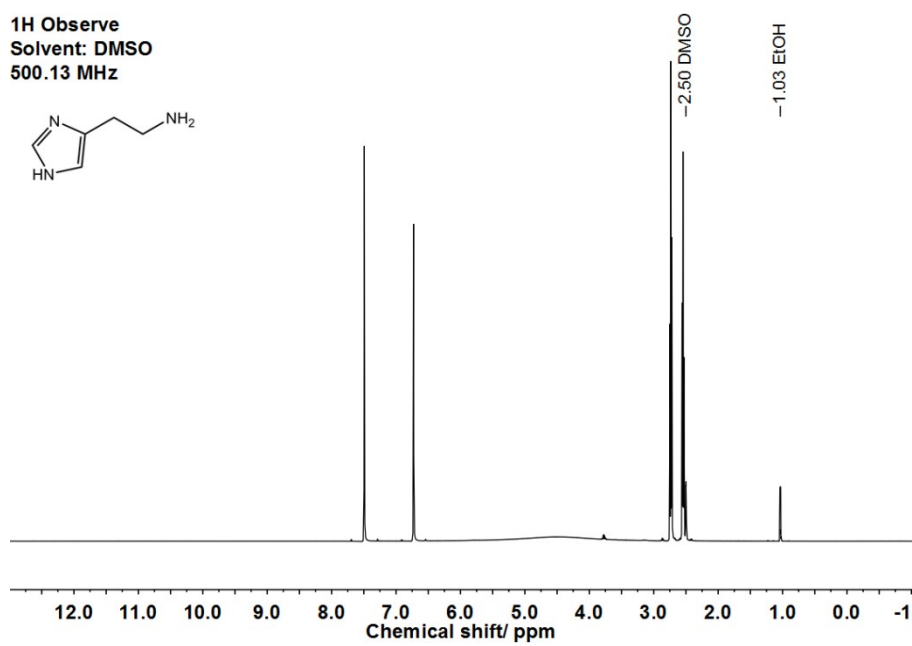

**Figure S3.**  $^1\text{H}$  NMR spectrum of histamine (500 MHz,  $\text{DMSO-}d_6$ )  $\delta$  7.49 (d,  $J = 1.1$  Hz, 1H, CH), 6.73 (d,  $J = 1.0$  Hz, 1H, CH), 2.73 (t,  $J = 7.1$  Hz, 2H,  $\text{CH}_2$ ), 2.55 (t,  $J = 7.1$  Hz, 2H,  $\text{CH}_2$ ).

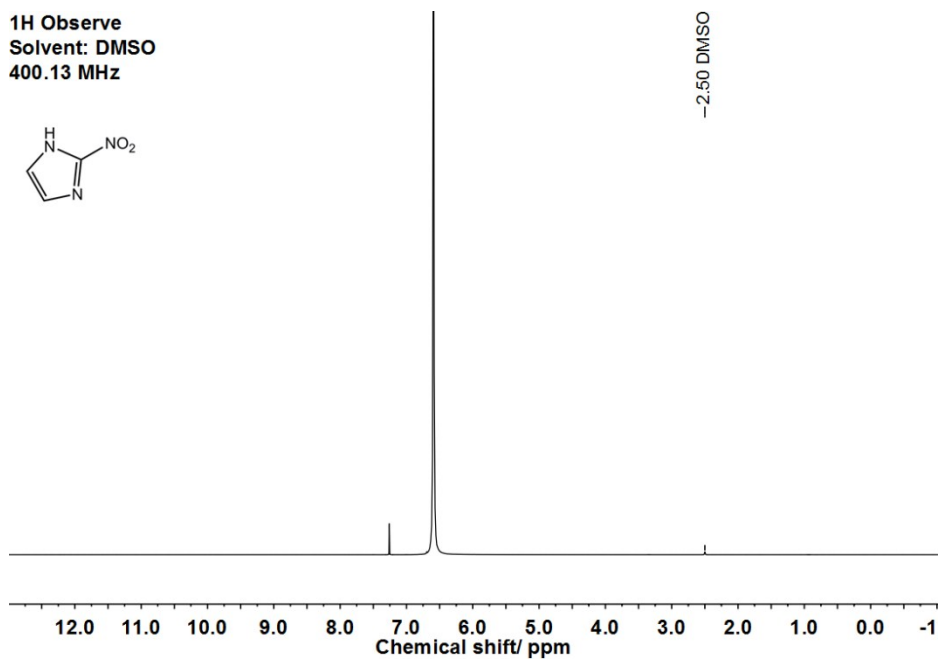

**Figure S4.**  $^1\text{H}$  NMR spectrum of 2-nitroimidazole (400 MHz,  $\text{DMSO-}d_6$ )  $\delta$  7.26 (s, 2H, CH), 6.59 (s, HCl).

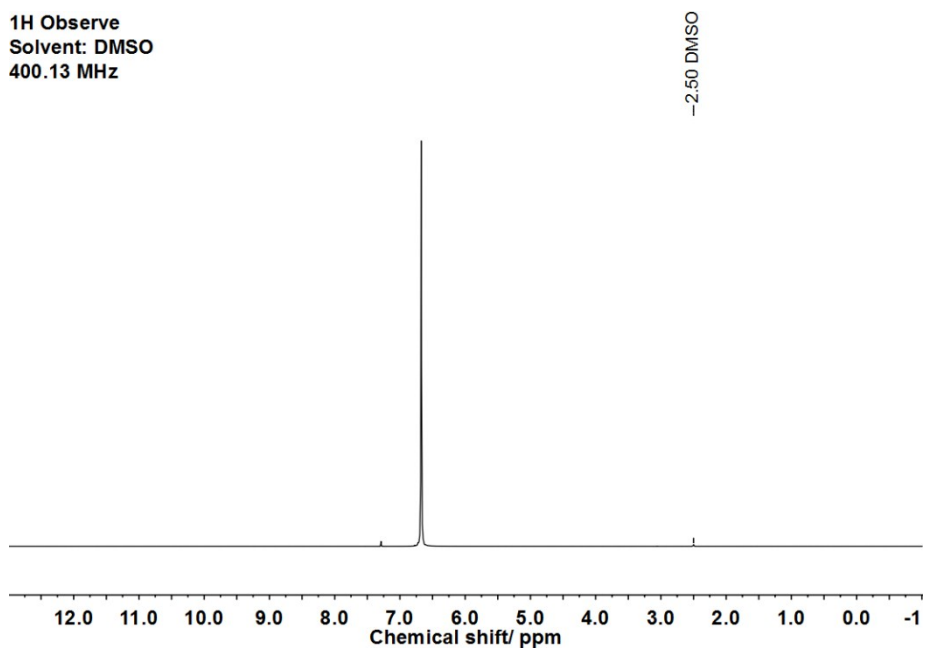

**Figure S5.**  $^1\text{H}$  NMR spectrum of compound **1** from solvothermal preparation, dissolved (400 MHz,  $\text{DMSO-}d_6$ )  $\delta$  7.29 (s, 2H, CH), 6.67 (s, HCl).

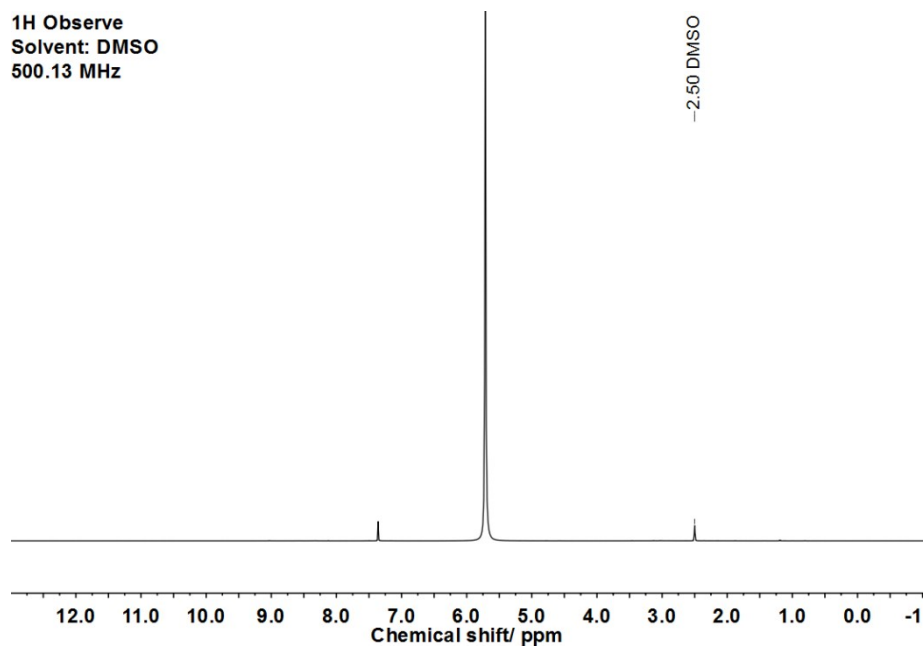

**Figure S6.**  $^1\text{H}$  NMR spectrum of compound **2** from solvothermal preparation, dissolved (500 MHz,  $\text{DMSO-}d_6$ )  $\delta$  7.36 (s, 2H, CH), 5.71 (s, HCl).

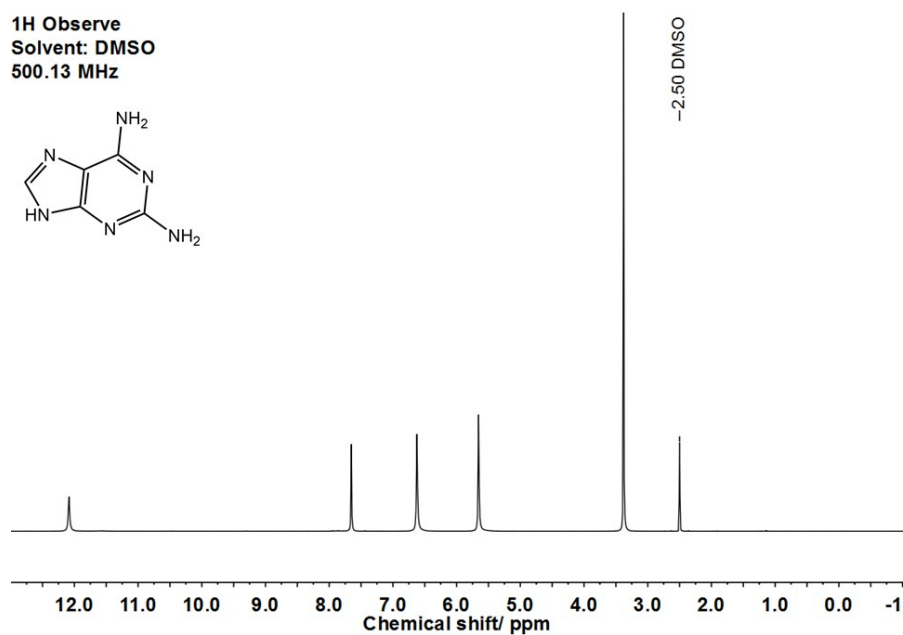

**Figure S7.**  $^1\text{H}$  NMR spectrum of 2,6-diaminopurine (500 MHz,  $\text{DMSO-}d_6$ )  $\delta$  12.09 (s, 1H, NH), 7.65 (s, 1H, CH), 6.62 (s, 2H,  $\text{NH}_2$ ), 5.66 (s, 2H,  $\text{NH}_2$ ), 3.38 (s,  $\text{H}_2\text{O}$ ).

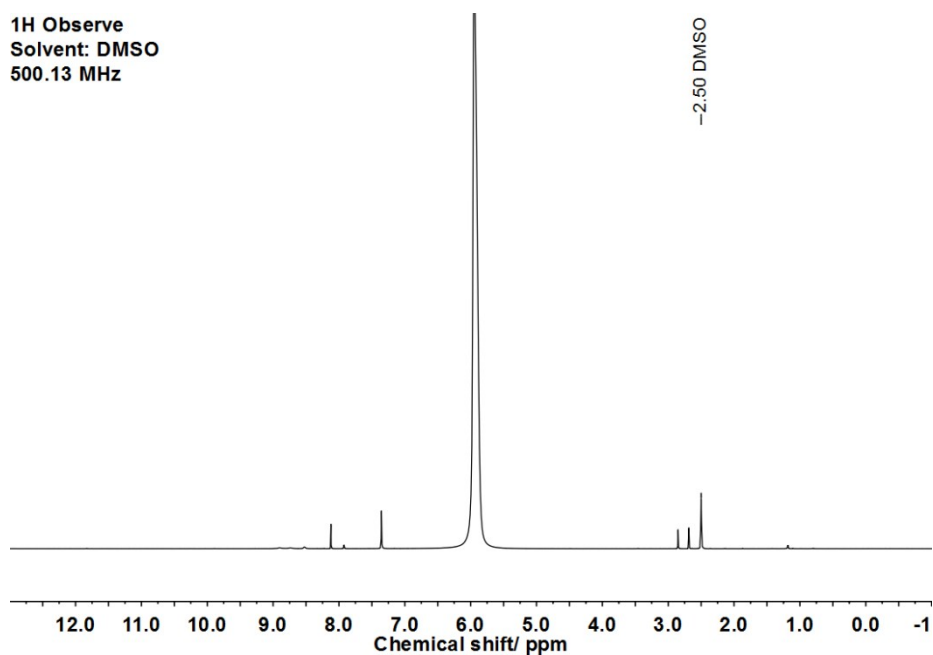

**Figure S8.**  $^1\text{H}$  NMR spectrum of compound **3** from solvothermal preparation, dissolved (500 MHz,  $\text{DMSO-}d_6$ )  $\delta$  8.12 (s, DMF), 7.35 (s, 2H, CH), 5.95 (s, HCl), 2.85 (s, DMF), 2.96 (s, DMF).

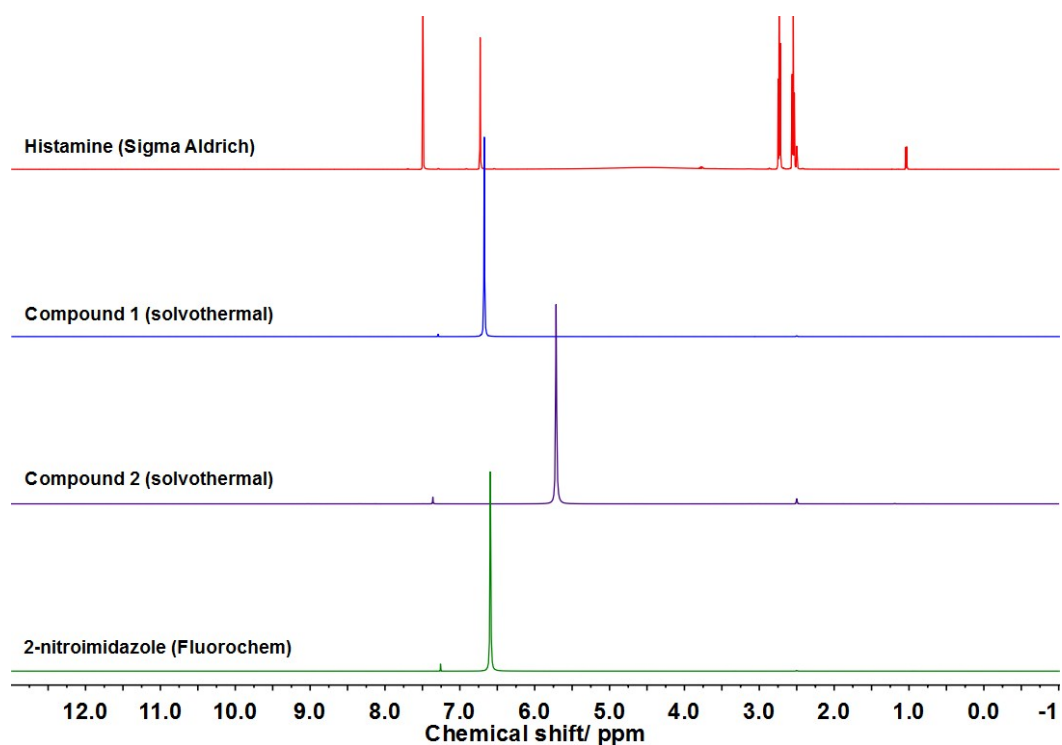

**Figure S9.** Stacked  $^1\text{H}$  NMR of histamine (red) and dissolved compound **1** (blue), compound **2** (purple) and 2-nitroimidazole (green).

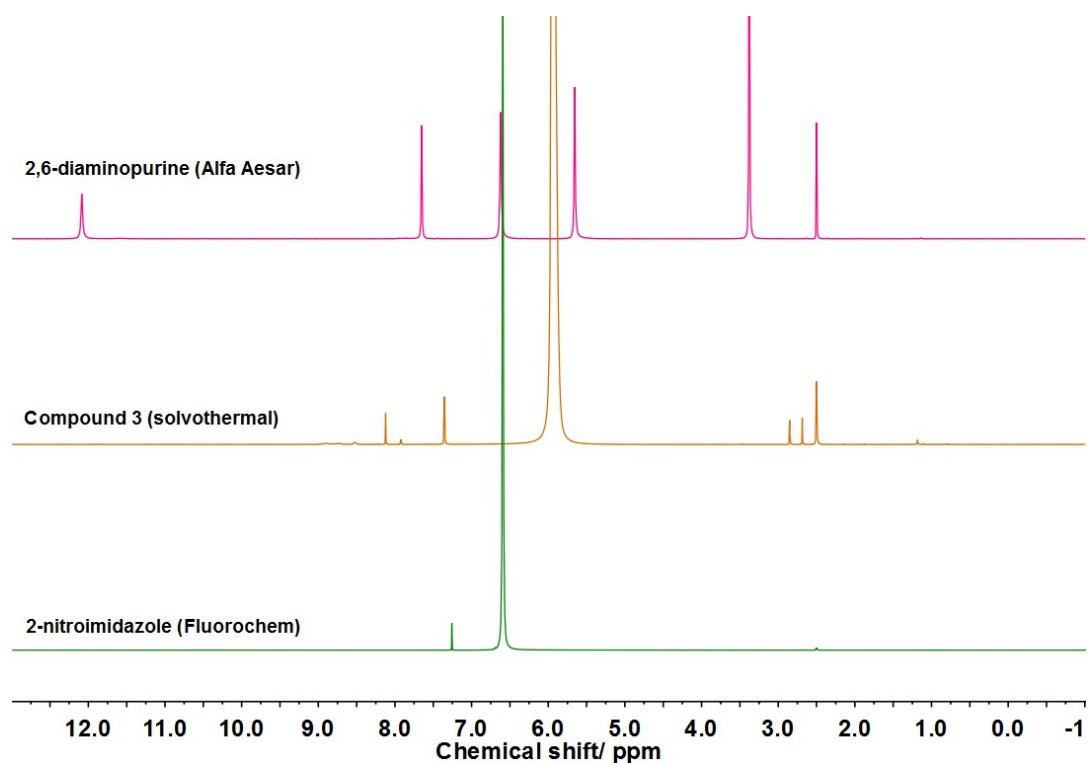

**Figure S10.** Stacked <sup>1</sup>H NMR of 2,6-diaminopurine (pink), dissolved compound **3** (orange) and 2-nitroimidazole (green).

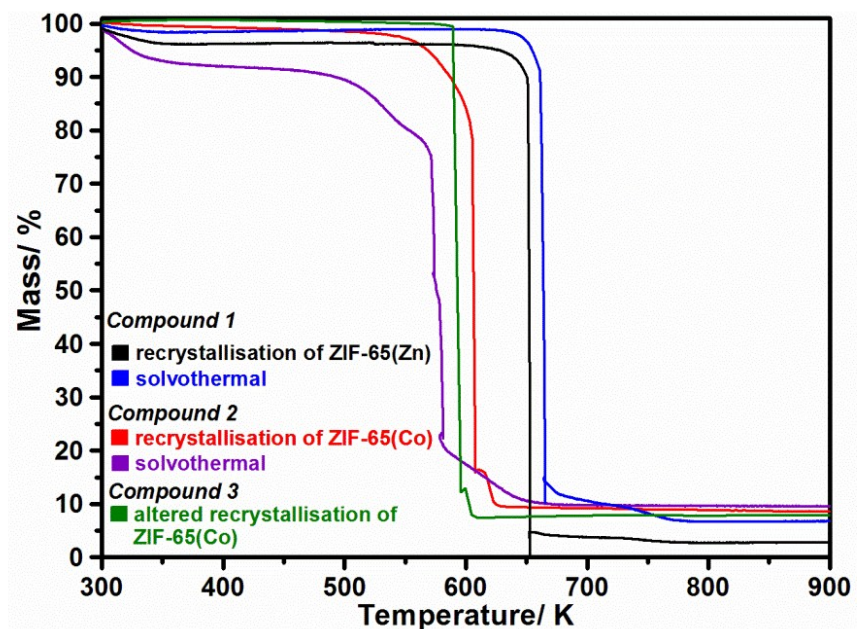

**Figure S11.** TGA (flowing air, ramp rate 5 °C min<sup>-1</sup>) of as-prepared compound **1**, **2** and **3** from the described synthetic procedures.

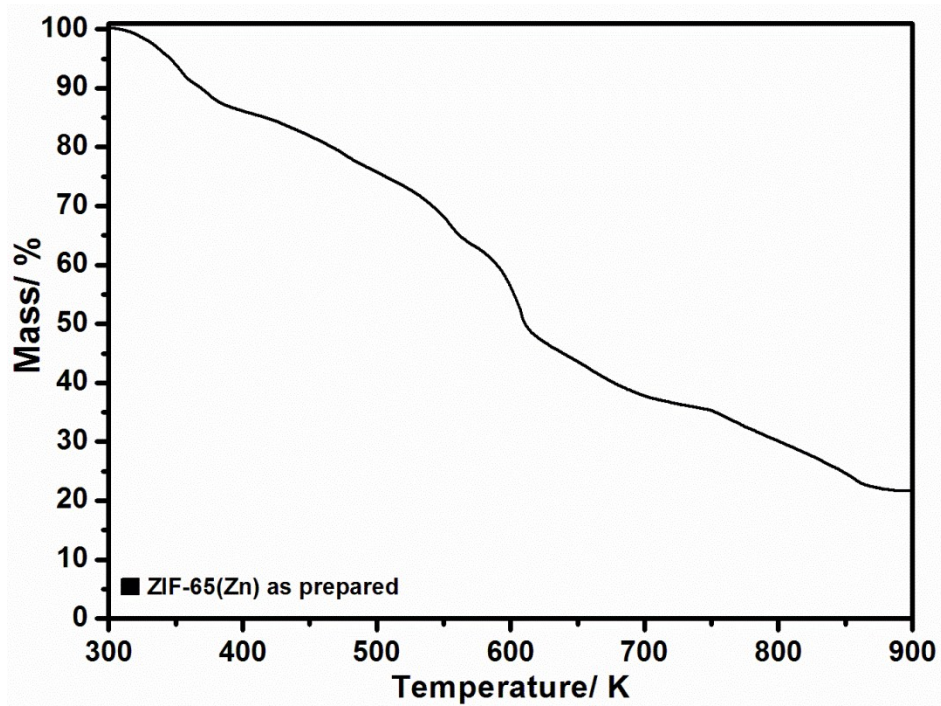

**Figure S12.** TGA (flowing air, ramp rate 5 °C min<sup>-1</sup>) of as-prepared ZIF-65(Zn).



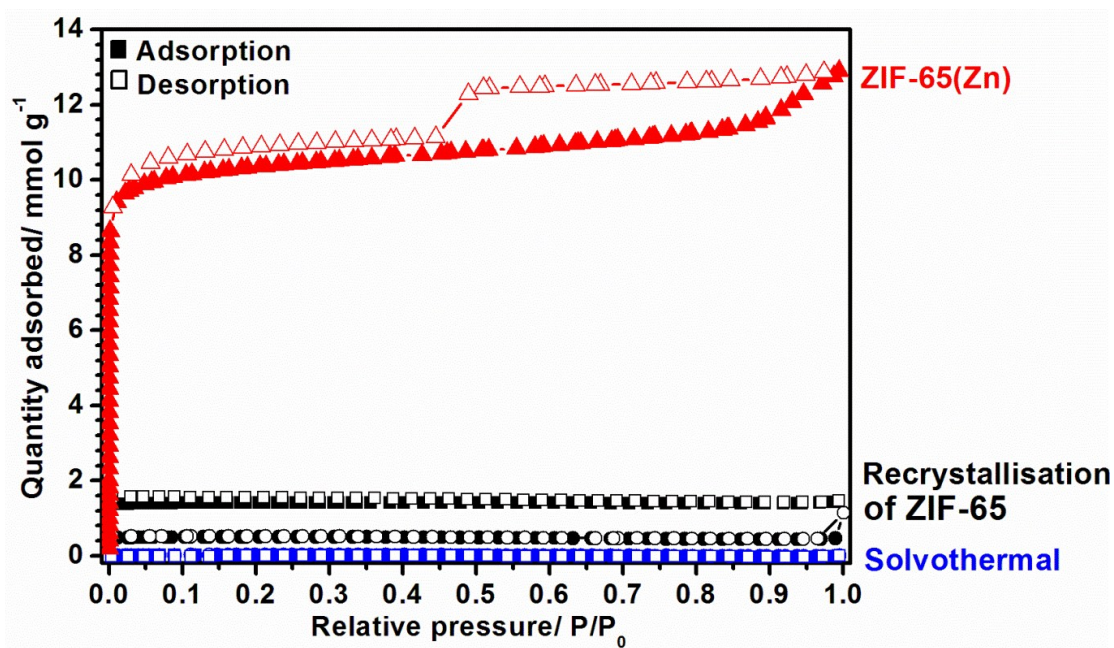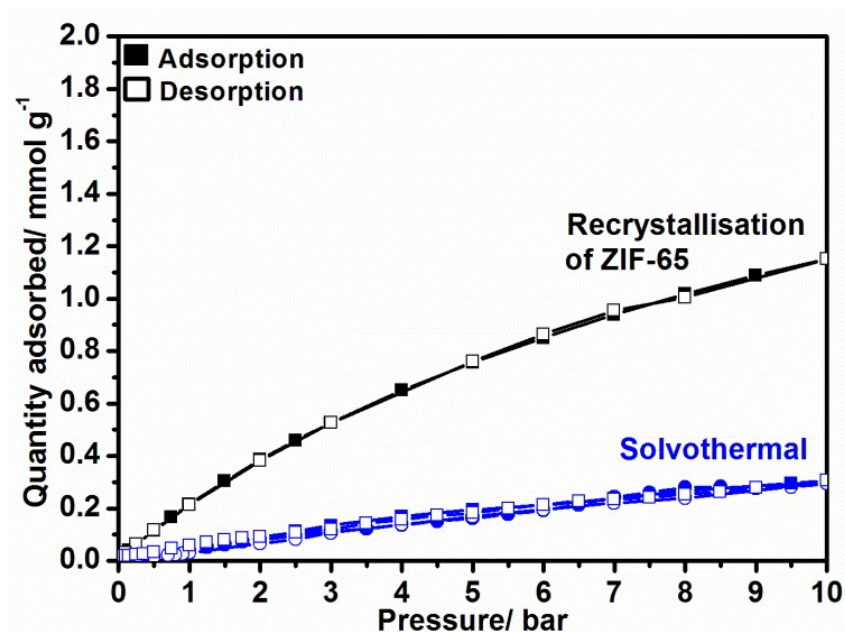

**Figure S13.** N<sub>2</sub> adsorption isotherms (-196 °C (top) and 25 °C (bottom)) for ZIF-65(Zn) (red) and compound **1** samples from the recrystallisation of ZIF-65(Zn) (black) and from direct solvothermal synthesis (blue). Activation conditions: 110 °C (circles), 140 °C (squares) and 200 °C (triangles) for 6 hours.

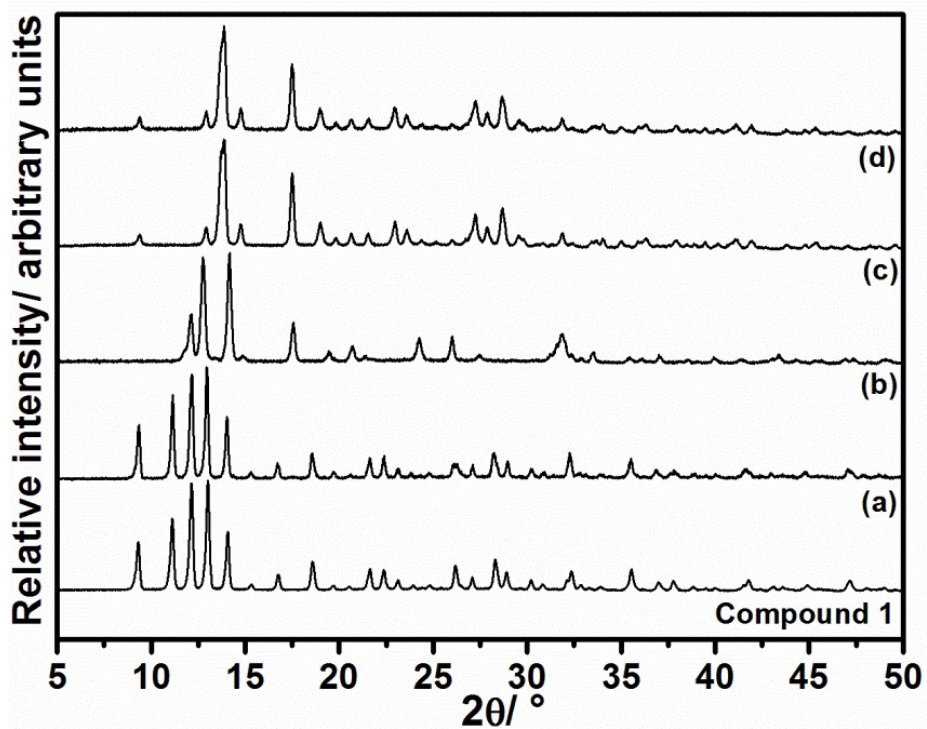

**Figure S14.** PXRD patterns of as-prepared compound **1** (bottom) and after various stability tests: (a) furnace heated (60 °C, 18 h,  $N_2+H_2O$  flow), (b) immersion in water (room temperature, 72 h), (c) water reflux (24 h) followed by (d) re-immersion in MeOH (room temperature 48 h).

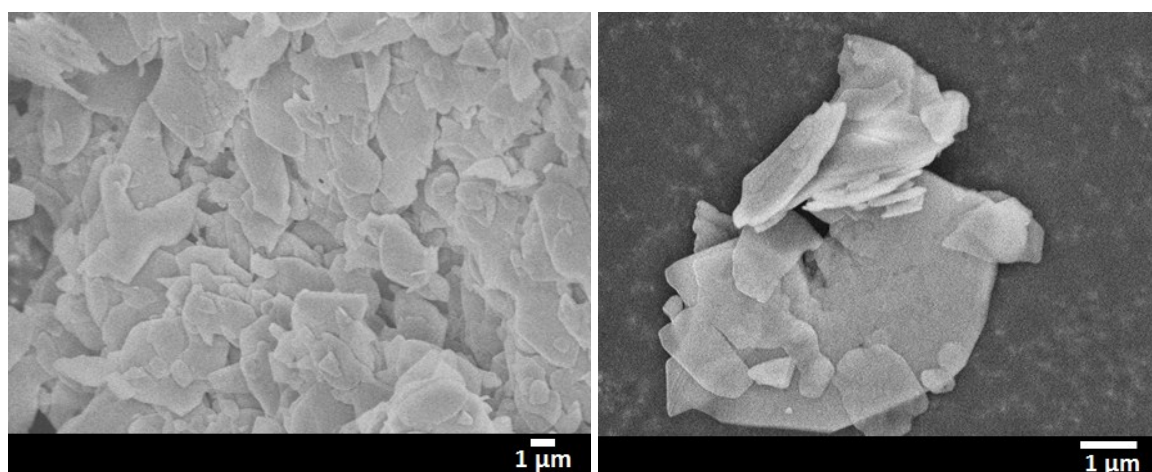

**Figure S15.** SEM images of compound **1** after refluxing in water (24 h).

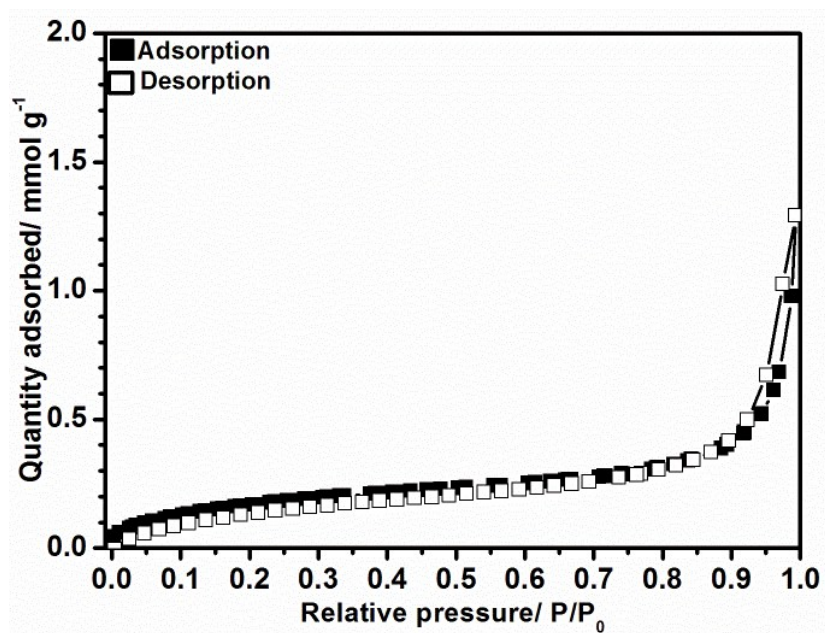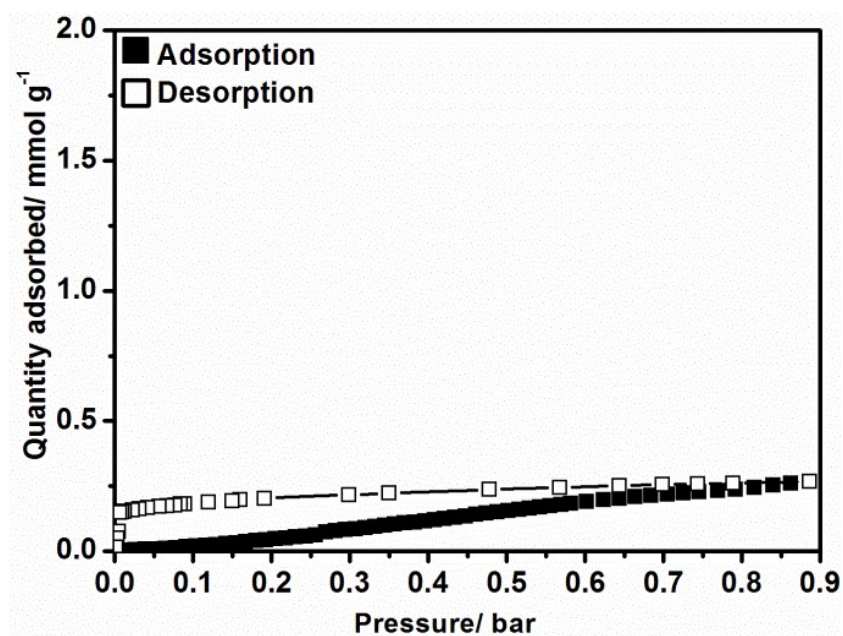

**Figure S16.** N<sub>2</sub> (-196 °C, top) and CO<sub>2</sub> (25 °C, bottom) isotherms of a dense phase achieved from refluxing compound **1** in water. Activation conditions: 140 °C for 6 hours.

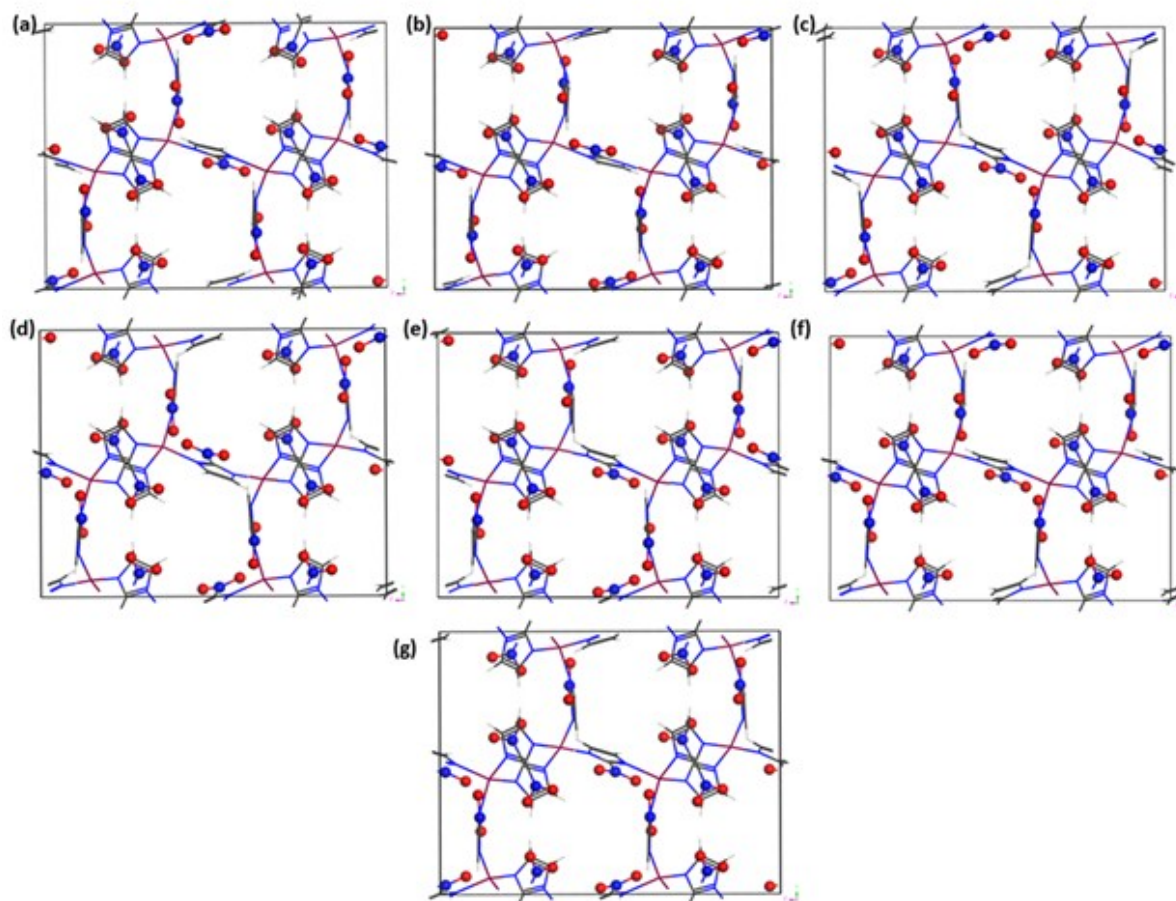

**Figure S17.** DFT-geometry optimized structures of the seven plausible models of compound **1** viewed along the  $a$  vector direction. Models: 1 (a), 2 (b), 3 (c), 4 (d), 5 (e), 6 (f) and 7 (g). Zn, orange; C, grey; O, red; N, blue; H, white.

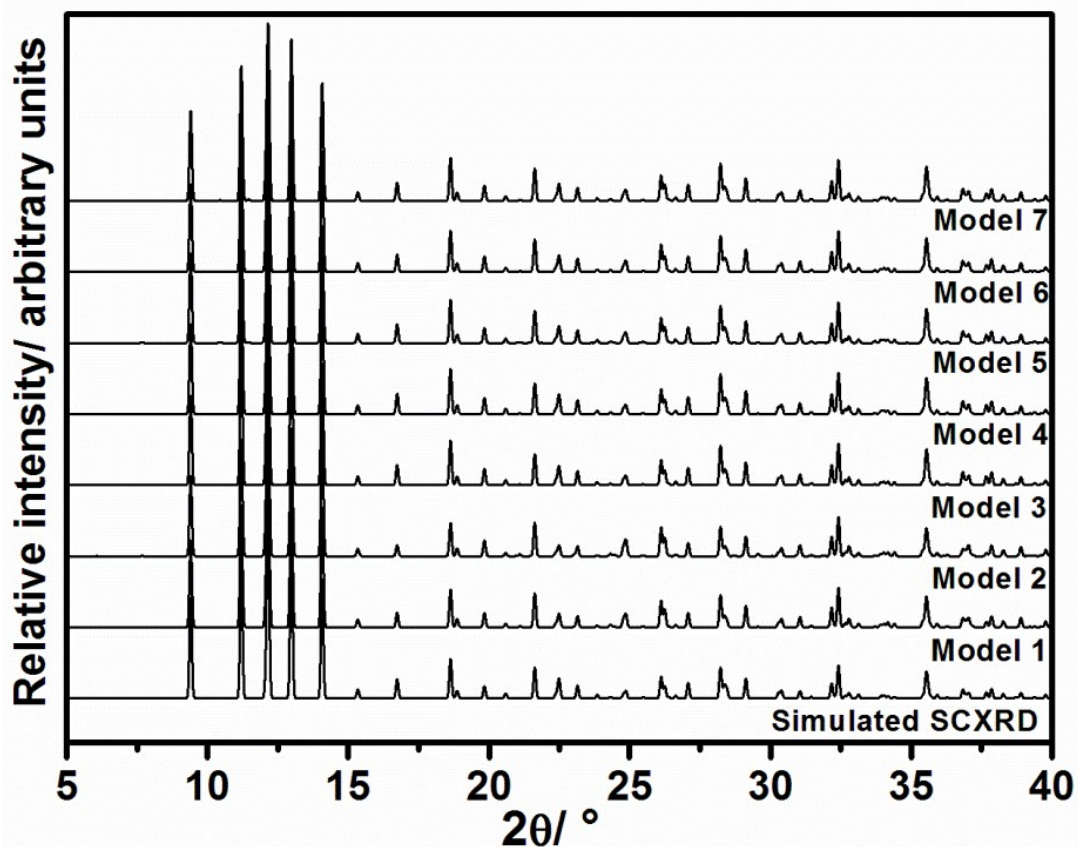

**Figure S18.** SCXRD of compound **1** compared to the calculated PXRD patterns for the seven DFT-geometry optimized structures of compound **1**.

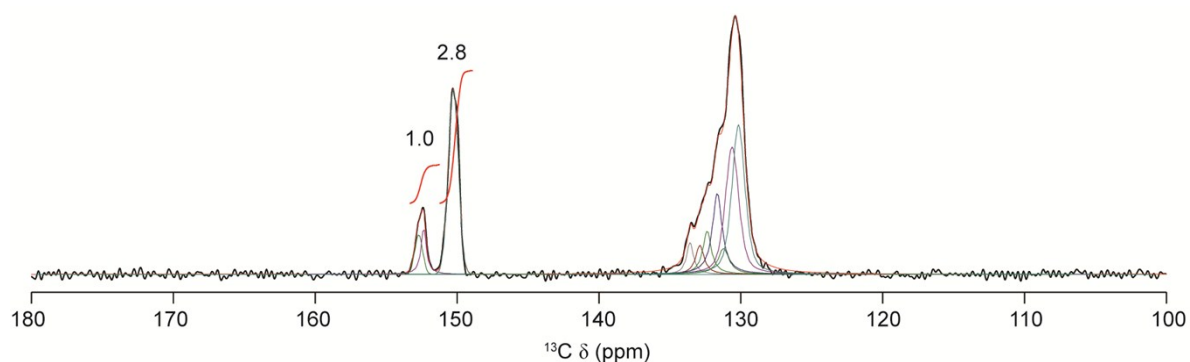

**Figure S19.** Fitting of the  $^{13}\text{C}$  (9.4 T, 12.5 kHz MAS) CP MAS NMR spectrum of compound **1**, performed using dmfit, with the (integrated) intensity ratio of the two C–NO<sub>2</sub> resonances (1.0:2.8) shown.

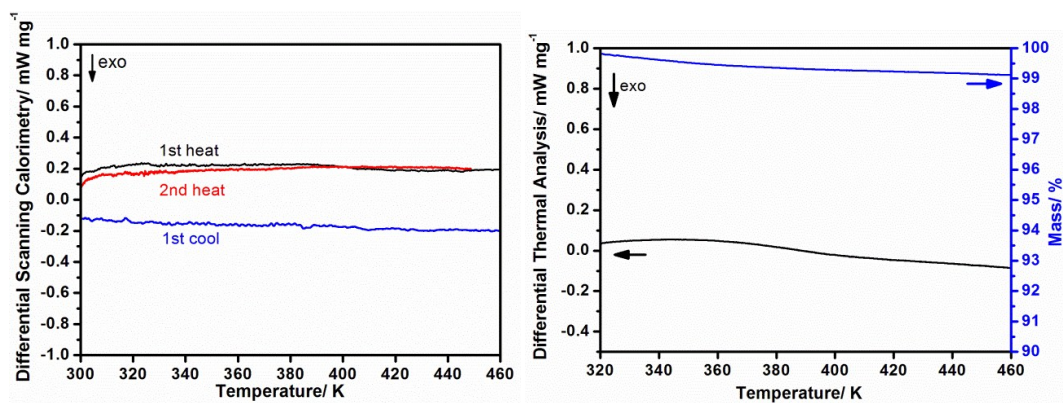

**Figure S20.** DSC (left) and DTA (right) of compound **1** (in flowing air).

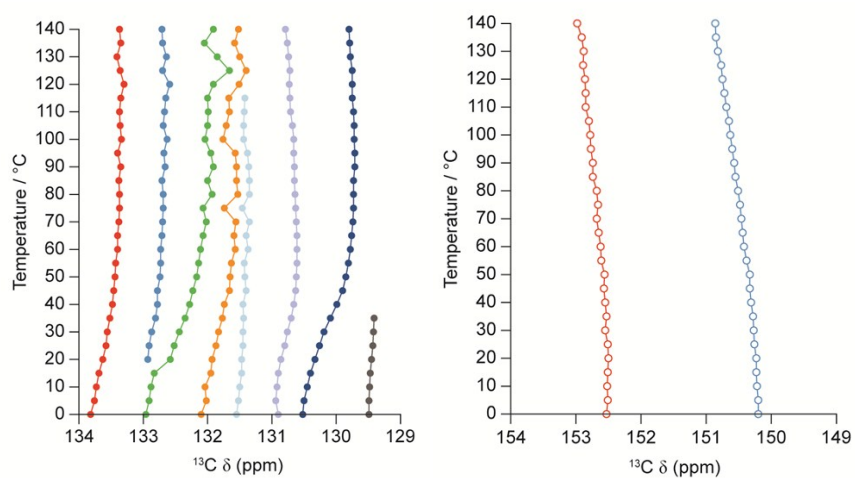

**Figure S21.** A plot of  $^{13}\text{C}$  (9.4 T, 12.5 kHz MAS) chemical shift position as a function of temperature for CH (left) and C-NO<sub>2</sub> (right) species in compound **1**.

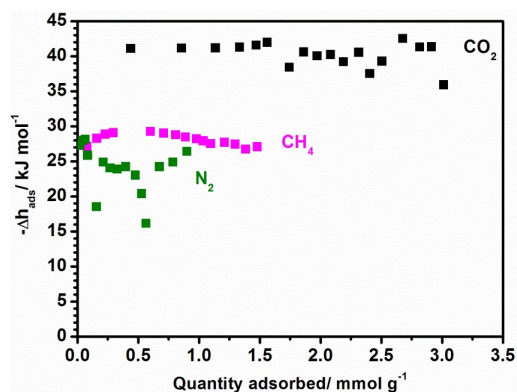

**Figure S22.** CO<sub>2</sub> (black), CH<sub>4</sub> (pink) and N<sub>2</sub> (green) adsorption enthalpies (0-10 bar, 30 °C) for compound **1** from the recrystallisation of ZIF-65(Zn).

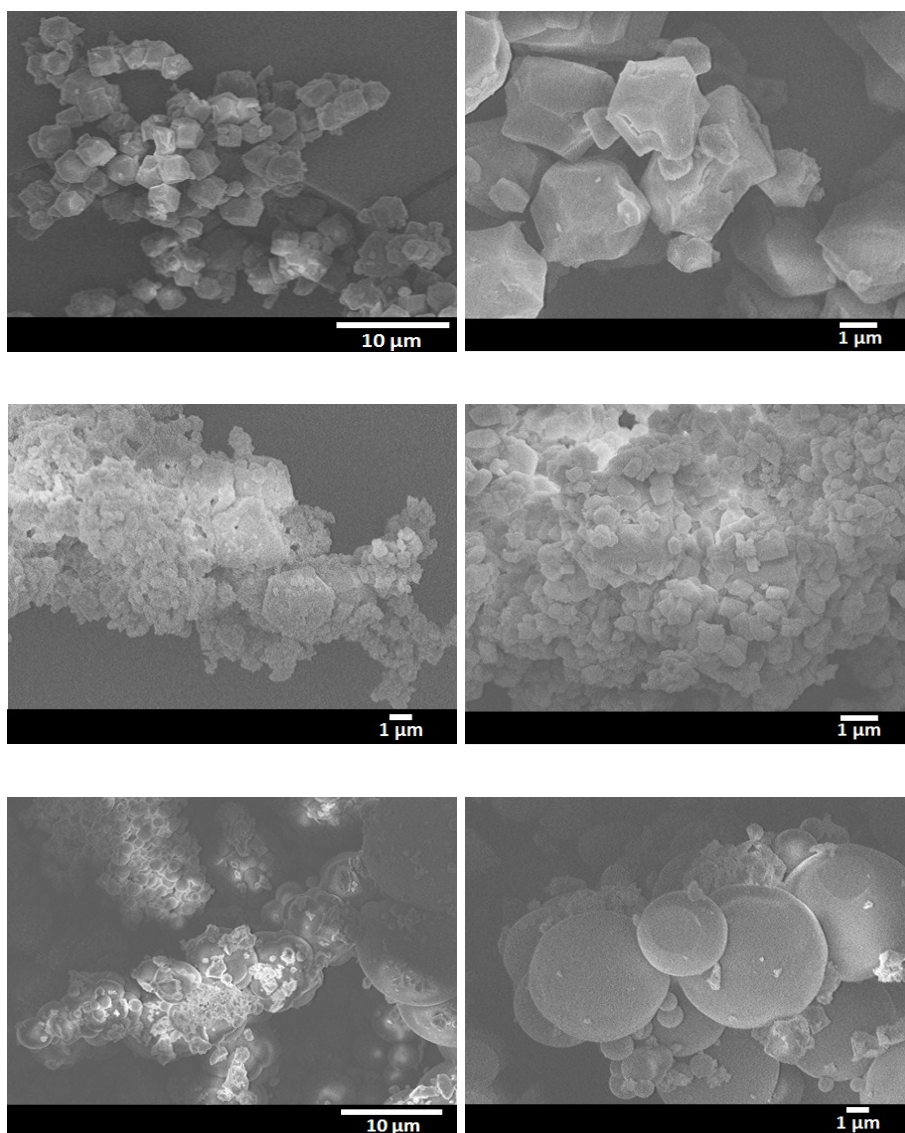

**Figure S23.** SEM images of as-prepared ZIF-65(Co) (top), compound **2** from the recrystallisation of ZIF-65(Co) (middle) and compound **2** from solvothermal synthesis (bottom).

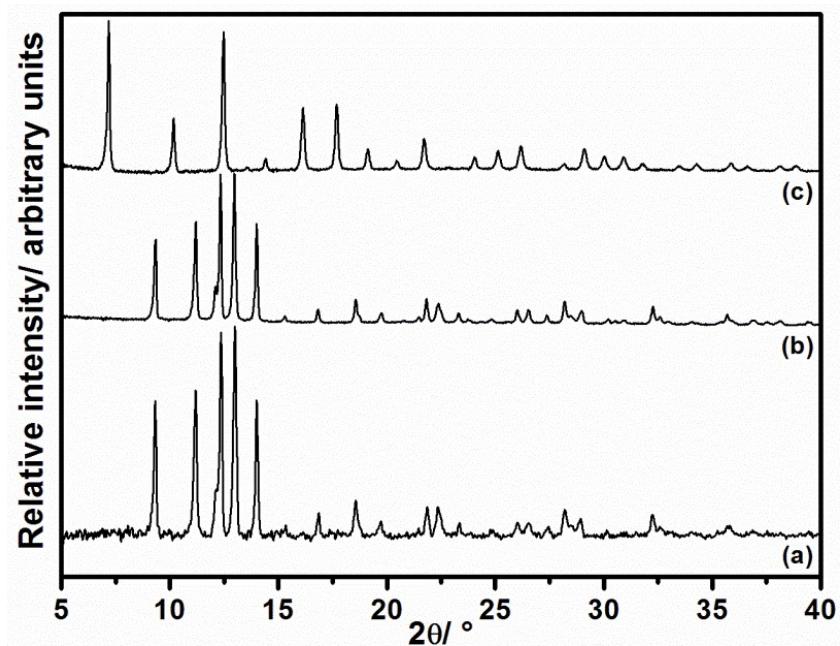

**Figure S24.** PXRD of compound **2** via (a) direct solvothermal synthesis and (b) recrystallization of ZIF-65(Co), and (c) of as prepared ZIF-65(Co).

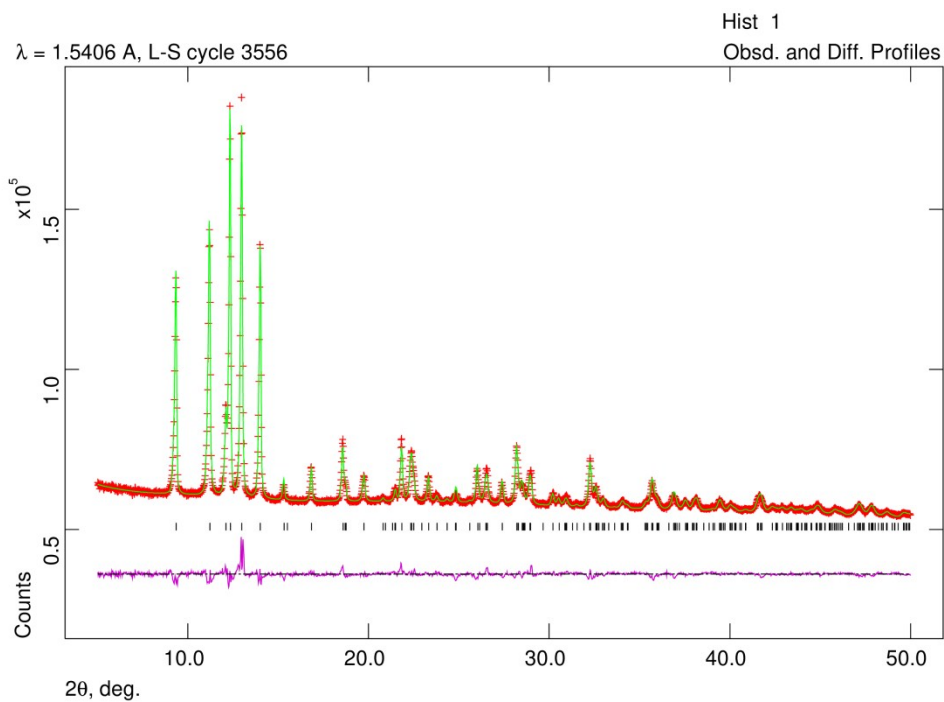

**Figure S25.** Difference plot (purple) between experimental PXRD profile of compound **2** from the recrystallisation of ZIF-65(Co) (red) and simulated PXRD (green).



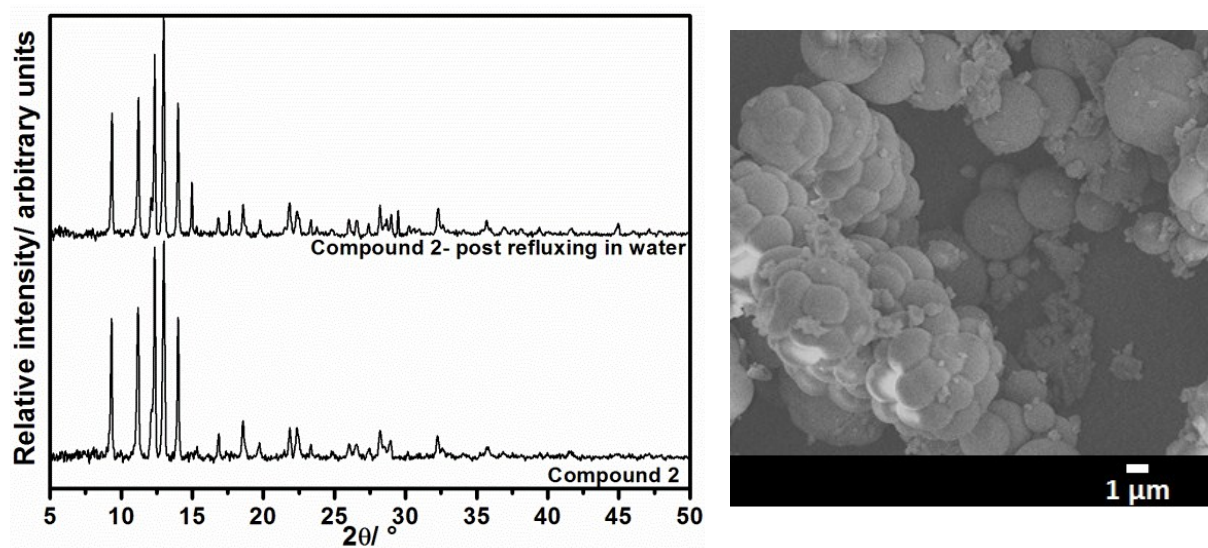

**Figure S26.** PXRd patterns (left) of as-prepared compound **2** from solvothermal synthesis and the same sample after refluxing in water (8 hours). SEM image (right) of compound **2** particles after refluxing in water.

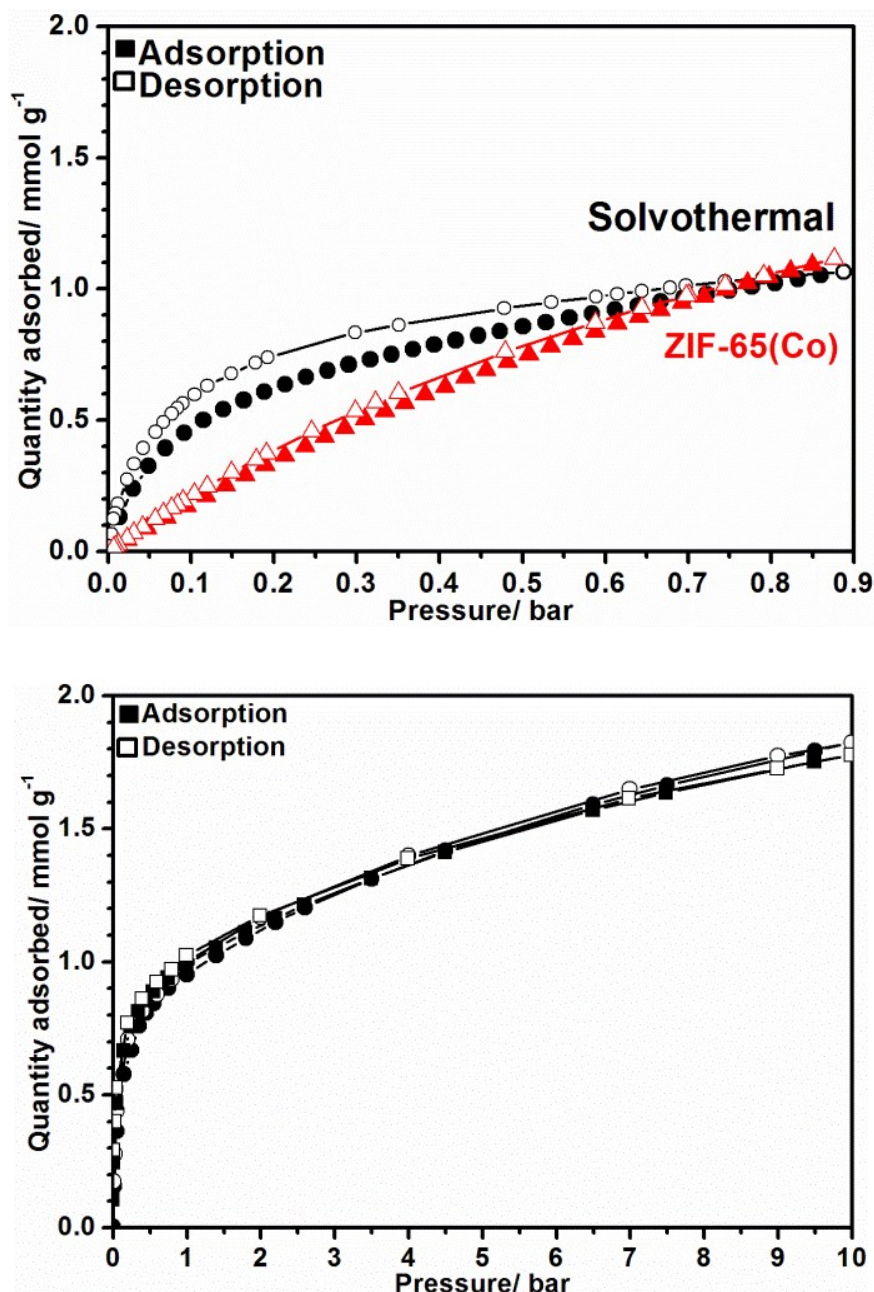

**Figure S27.** (Above) Low pressure CO<sub>2</sub> single gas adsorption isotherms (298 K, 1 bar, top) for ZIF-65(Co) and compound **2** from direct solvothermal synthesis. (Below) High pressure isotherm for compound **2** from direct synthesis (298 K, 10 bar, bottom) Activation conditions: 110 °C (circles), 150 °C (squares) and 200 °C (triangles) for 6 h.

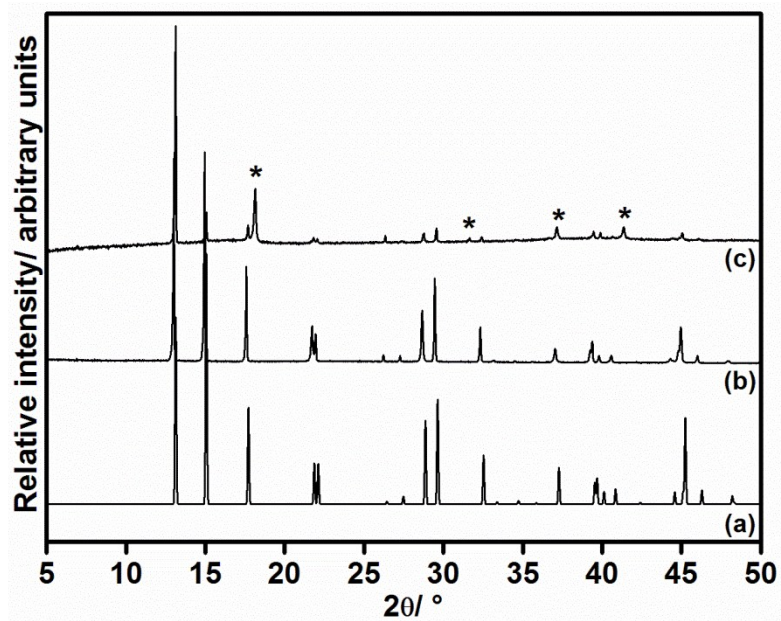

**Figure S28.** PXRD patterns of compound **3** prepared via two different synthetic routes: (b) recrystallization of ZIF-65(Co) and (c) direct solvothermal synthesis (\* Teflon insert), compared to (a) the simulated PXRD from single crystal XRD data of compound **3**

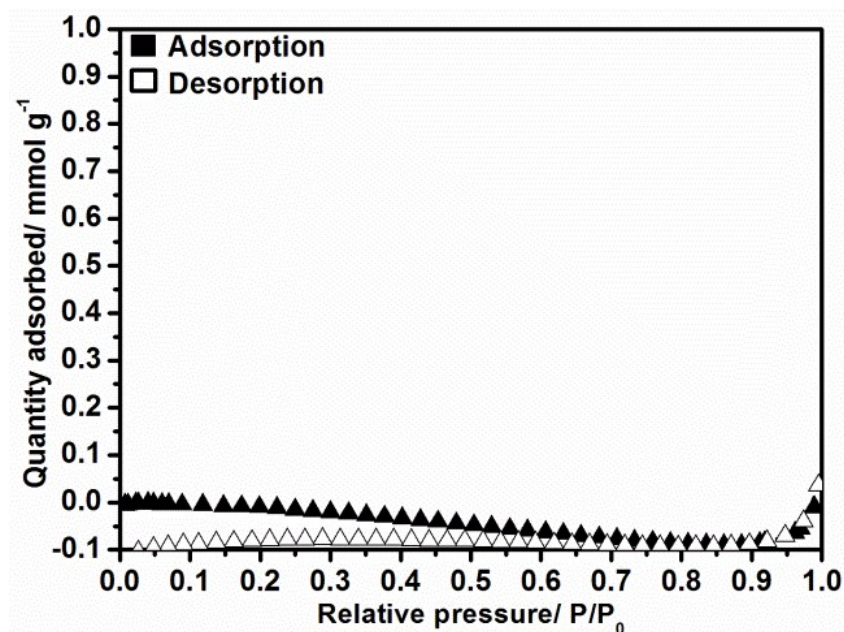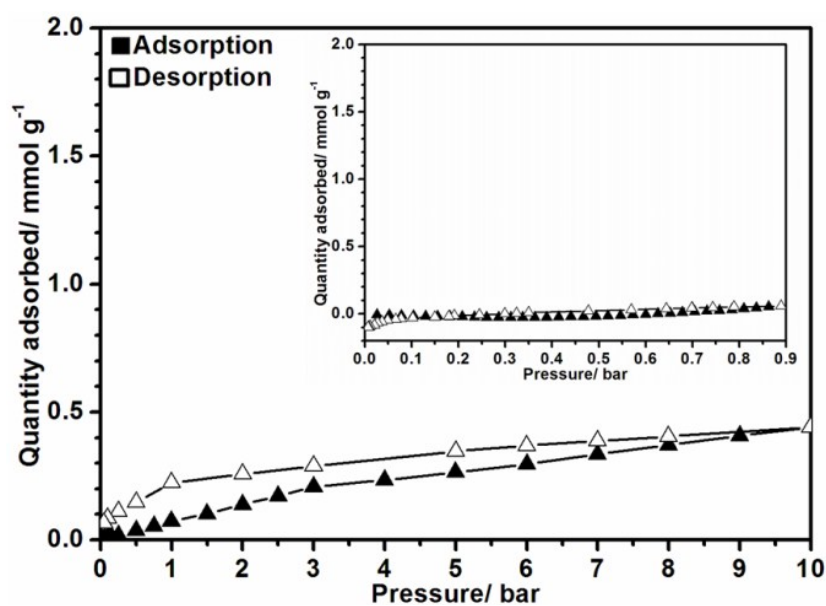

**Figure S29.** N<sub>2</sub> adsorption isotherm (298 K, top) for compound **3**. High pressure CO<sub>2</sub> single gas adsorption isotherms (298 K, 10 bar, bottom) for compound **3** from recrystallisation of ZIF-65(Co) and inset the low pressure isotherm (298 K, 1 bar). Activation conditions: 120 °C for 6 h.

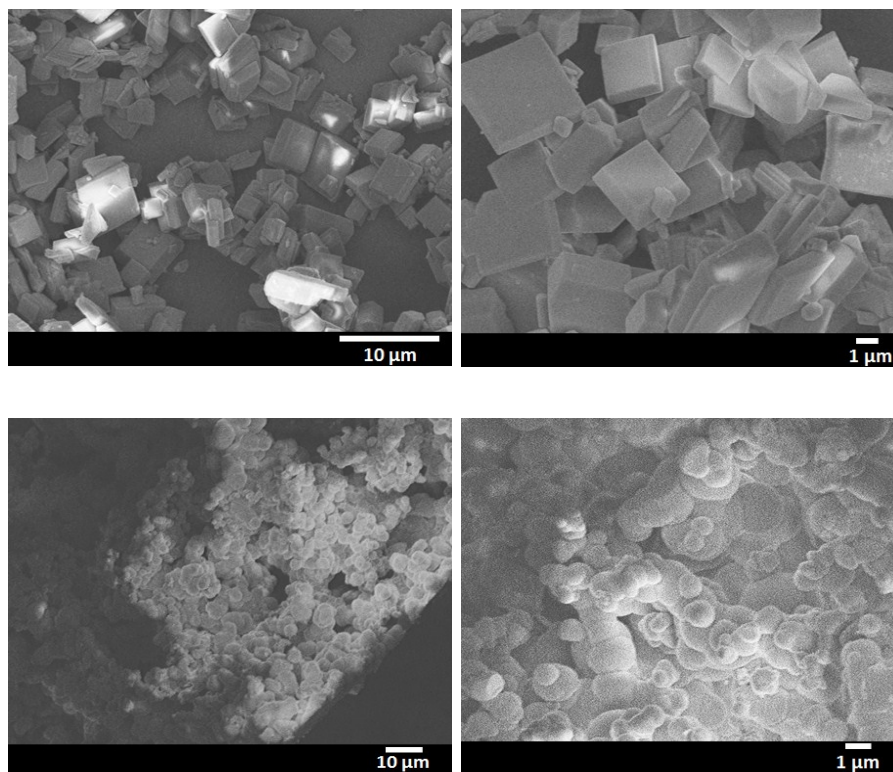

**Figure S30.** SEM images of compound **3** from the recrystallisation of ZIF-65(Co) (top) and from solvothermal synthesis (bottom).

**Table S1.** Gas adsorption parameters for compound **1**. Adsorbed quantities (30 °C, 1 bar), Henry's law constants ( $K_H$ ), enthalpies of adsorption ( $(-\Delta h_{ads})$ ), selectivity ( $\alpha$ ) CO<sub>2</sub>/ N<sub>2</sub> calculated at 1 bar and selectivity ( $\alpha$ ) CO<sub>2</sub>/ CH<sub>4</sub> calculated at 1 and 5 bar.

| <b>Gas type</b> | <b>Amount adsorbed/<br/>mmol g<sup>-1</sup></b> | <b><math>K_H</math>/<br/>mmol g<sup>-1</sup><br/>bar<sup>-1</sup></b> | <b><math>(-\Delta h_{ads})</math>/<br/>kJ mol<sup>-1</sup></b> | <b><math>\alpha</math> CO<sub>2</sub>/N<sub>2</sub><br/>(15/85%)<br/>1 bar</b> | <b><math>\alpha</math> CO<sub>2</sub>/CH<sub>4</sub><br/>(50/50%)<br/>1 bar</b> | <b><math>\alpha</math> CO<sub>2</sub>/CH<sub>4</sub><br/>(50/50%)<br/>5 bar</b> |
|-----------------|-------------------------------------------------|-----------------------------------------------------------------------|----------------------------------------------------------------|--------------------------------------------------------------------------------|---------------------------------------------------------------------------------|---------------------------------------------------------------------------------|
| CO <sub>2</sub> | 1.80                                            | 35.4                                                                  | 39.5                                                           |                                                                                |                                                                                 |                                                                                 |
| CH <sub>4</sub> | 0.45                                            | 0.7                                                                   | 26.0                                                           | 75                                                                             | 17                                                                              | 10                                                                              |
| N <sub>2</sub>  | 0.21                                            | 0.2                                                                   | 18.5                                                           |                                                                                |                                                                                 |                                                                                 |
